# Supplementary material
Source: PubMed Central journal article supplement (PMC6676978)
Supplement: bhx309supplementary_material.pdf [file bhx309supplementary_material.pdf]

## Supplementary Material

*Joint Analysis of Cortical Area and Thickness as a Replacement for the  
Analysis of the Volume of the Cerebral Cortex*

*Anderson M. Winkler, Douglas N. Greve, Knut J. Bjuland, Thomas E. Nichols,  
Mert R. Sabuncu, Asta K. Håberg, Jon Skranes and Lars M. Rimol*  
doi: [10.1093/cercor/bhx308](https://doi.org/10.1093/cercor/bhx308)

Due to its size (7.8 GB), the Supplementary Material is deposited for long term preservation and free public access at the Dryad Digital Repository, under the Digital Object Identifier (DOI):

**[10.5061/dryad.h1v85](https://doi.org/10.5061/dryad.h1v85)**

The results shown in the article make ample reference to this material and its inspection is encouraged. The Supplementary Material also includes high resolution and complementary views of all figures shown in the main text.

A mirrored copy of the same material, that does not require download, although without guarantee of permanent preservation, is currently available at: <http://bit.ly/2x9F96b>.
